# Supplementary figures and images for: Fabrication of a 3D self-supporting Ni–P/Ni2P/CC composite and its robust hydrogen evolution reaction properties in alkaline solution
Source: Royal Society of Chemistry journal article supplement (doi:10.1039/d0nj00727g), 2020-01-01

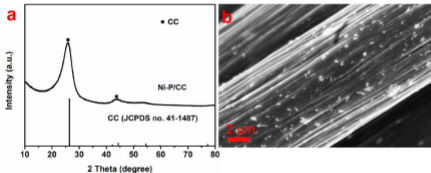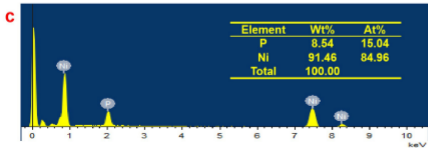

Supplement: d0nj00727g2.pdf [file d0nj00727g2.pdf]

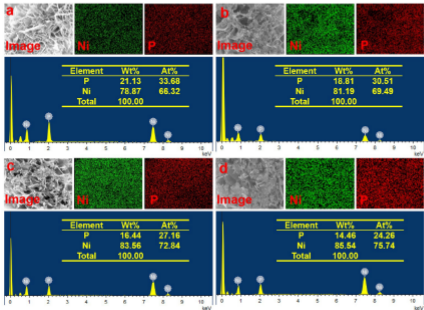

Supplement: d0nj00727g3.pdf [file d0nj00727g3.pdf]

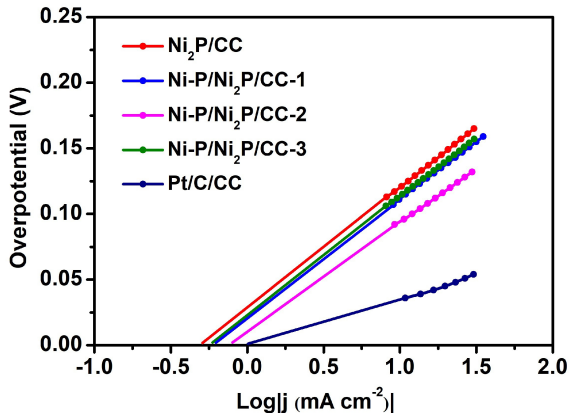

Supplement: d0nj00727g4.pdf [file d0nj00727g4.pdf]

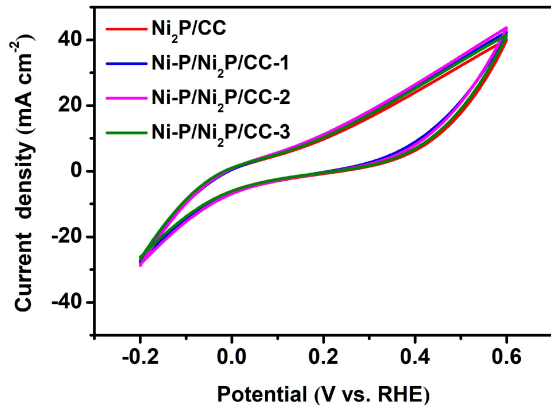

Supplement: d0nj00727g6.pdf [file d0nj00727g6.pdf]

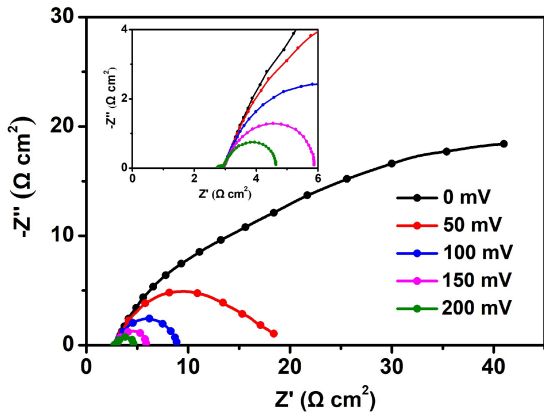

Supplement: d0nj00727g7.pdf [file d0nj00727g7.pdf]

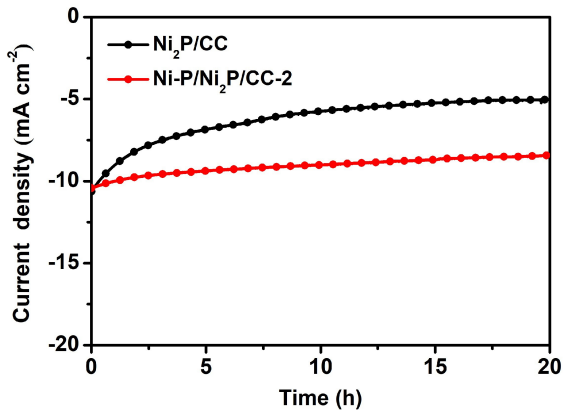

Supplement: d0nj00727g8.pdf [file d0nj00727g8.pdf]

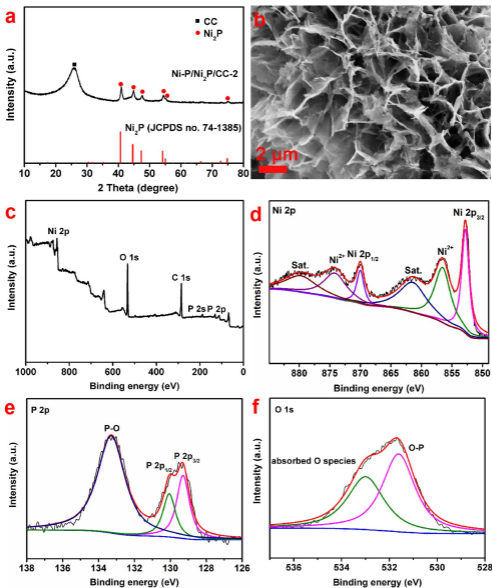

Supplement: d0nj00727g9.pdf [file d0nj00727g9.pdf]
